# Supplementary material for: Communicating science: Sending the right message to the right audience
Source: Atypon-hosted journal article supplement (doi:10.1139/facets-2016-0015), 2016-08-31
Supplement: facets-2016-0015_supplement2.pdf [file facets-2016-0015_supplement2.pdf]

## Web-only material

**Table S1.** Details of model fit and parameter inclusion for the full suite of eight models fitted to each response variable. Models within  $\Delta\text{AICc} \leq 2$  from the ‘best model’ (rank 1) were incorporated into the final averaged model for each response variable (Table 1), following Burnham and Anderson (2002), and are depicted in bold. For simplicity, parameter estimates for each level of ‘age’ and ‘group’ are not presented. Plus (+) indicates that the focal fixed effect (age or group) was included in the model, whereas blank cells represent models excluding the fixed effect. LogLik and AICwt represent the log-likelihood and AICc weight of each model, respectively. R<sup>2</sup> and df represent the goodness of fit and residual degrees of freedom from the global model for each response variable.

| Response Variable                                       | Model Rank | (Intercept) | Age | Group | General Trust | LogLik  | AICc         | $\Delta\text{AICc}$ | AICwt       |
|---------------------------------------------------------|------------|-------------|-----|-------|---------------|---------|--------------|---------------------|-------------|
| Social Media - TRUST<br>R <sup>2</sup> = 0.14, df = 272 | 1          | -0.17       | +   |       |               | -402.70 | <b>834.9</b> | <b>0.00</b>         | <b>0.28</b> |
|                                                         | 2          | -0.21       |     | +     | 0.66          | -407.26 | <b>835.3</b> | <b>0.39</b>         | <b>0.23</b> |
|                                                         | 3          | 0.17        |     | +     |               | -408.61 | <b>835.8</b> | <b>0.94</b>         | <b>0.17</b> |
|                                                         | 4          | -0.36       | +   |       | 0.33          | -402.36 | <b>836.4</b> | <b>1.53</b>         | <b>0.13</b> |
|                                                         | 5          | -0.43       |     |       | 0.68          | -413.54 | 837.2        | 2.37                | 0.08        |
|                                                         | 6          | -0.04       |     |       |               | -414.95 | 838.0        | 3.11                | 0.06        |
|                                                         | 7          | -0.04       | +   | +     |               | -399.11 | 839.0        | 4.09                | 0.04        |
|                                                         | 8          | -0.25       | +   | +     | 0.40          | -398.60 | 840.3        | 5.38                | 0.02        |
| Social Media - USE<br>R <sup>2</sup> = 0.20, df = 267   | 1          | 0.11        | +   |       |               | -381.72 | <b>792.9</b> | <b>0.00</b>         | <b>0.47</b> |
|                                                         | 2          | -0.11       | +   |       | 0.41          | -381.16 | <b>794.0</b> | <b>1.11</b>         | <b>0.26</b> |
|                                                         | 3          | 0.35        | +   | +     |               | -377.02 | <b>794.8</b> | <b>1.90</b>         | <b>0.18</b> |
|                                                         | 4          | 0.13        | +   | +     | 0.41          | -796.0  | 796.0        | 3.08                | 0.10        |

|   |       |  |   |      |   |        |      |      |  |
|---|-------|--|---|------|---|--------|------|------|--|
|   |       |  |   |      |   | 376.45 | 5    |      |  |
| 5 | -0.25 |  | + | 0.77 | - | 809.5  | 16.6 | 0.00 |  |
|   |       |  |   |      |   | 394.40 | 9    | 2    |  |
| 6 | 0.19  |  | + |      | - | 811.2  | 18.2 | 0.00 |  |
|   |       |  |   |      |   | 396.29 | 2    | 4    |  |
| 7 | -0.52 |  |   | 0.91 | - | 821.6  | 28.6 | 0.00 |  |
|   |       |  |   |      |   | 405.71 | 3    | 5    |  |
| 8 | 0.00  |  |   |      | - | 824.4  | 31.4 | 0.00 |  |
|   |       |  |   |      |   | 408.15 | 5    | 7    |  |

| Response Variable                                      | Model Rank | (Intercept) | Age | Group | General Trust | LogLik | AICc         | $\Delta$ AICc | wt          |
|--------------------------------------------------------|------------|-------------|-----|-------|---------------|--------|--------------|---------------|-------------|
| Academic Journals - TRUST<br>$R^2 = 0.19$ , $df = 308$ | 1          | -0.54       |     |       | 0.72          | -      | <b>886.1</b> | <b>0.00</b>   | <b>0.27</b> |
|                                                        |            |             |     |       |               | 436.95 | <b>7</b>     |               |             |
|                                                        | 2          | -0.50       | +   |       | 0.58          | -      | <b>886.5</b> | <b>0.42</b>   | <b>0.22</b> |
|                                                        |            |             |     |       |               | 426.42 | <b>9</b>     |               |             |
|                                                        | 3          | -0.36       |     |       | 0.69          | -      | <b>887.1</b> | <b>0.96</b>   | <b>0.17</b> |
|                                                        |            |             |     |       |               | 432.15 | <b>3</b>     |               |             |
|                                                        | 4          | -0.18       | +   | +     |               | -      | <b>887.4</b> | <b>1.25</b>   | <b>0.15</b> |
|                                                        |            |             |     |       |               | 427.94 | <b>2</b>     |               |             |
|                                                        | 5          | -0.14       |     |       |               | -      | 888.5        | 2.33          | 0.09        |
|                                                        |            |             |     |       |               | 439.16 | 0            |               |             |
|                                                        | 6          | 0.03        |     | +     |               | -      | 889.0        | 2.93          | 0.06        |
|                                                        |            |             |     |       |               | 434.21 | 9            |               |             |
|                                                        | 7          | -0.32       | +   | +     | 0.58          | -      | 891.1        | 5.02          | 0.02        |
|                                                        |            |             |     |       |               | 423.09 | 8            |               |             |
|                                                        | 8          | -0.01       | +   | +     |               | -      | 891.9        | 5.76          | 0.02        |
|                                                        |            |             |     |       |               | 424.60 | 2            |               |             |
| Academic Journals - USE<br>$R^2 = 0.35$ , $df = 304$   | 1          | 0.52        |     | +     |               | -      | <b>782.9</b> | <b>0.00</b>   | <b>0.57</b> |
|                                                        |            |             |     |       |               | 381.12 | <b>4</b>     |               |             |
|                                                        | 2          | 0.31        |     | +     | 0.37          | -      | <b>783.5</b> | <b>0.63</b>   | <b>0.42</b> |
|                                                        |            |             |     |       |               | 380.36 | <b>7</b>     |               |             |
|                                                        | 3          | 0.20        | +   | +     |               | -      | 791.5        | 8.64          | 0.00        |
|                                                        |            |             |     |       |               | 374.41 | 8            |               |             |
|                                                        | 4          | 0.04        | +   | +     | 0.31          | -      | 792.7        | 9.84          | 0.00        |
|                                                        |            |             |     |       |               | 373.86 | 7            |               |             |
|                                                        | 5          | -0.11       |     |       |               | -      | 831.8        | 48.9          | 0.00        |
|                                                        |            |             |     |       |               | 410.85 | 9            | 5             |             |
|                                                        | 6          | -0.33       |     |       | 0.41          | -      | 832.3        | 49.4          | 0.00        |
|                                                        |            |             |     |       |               | 410.05 | 7            | 3             |             |
|                                                        | 7          | -0.32       | +   |       |               | -      | 837.0        | 54.1          | 0.00        |
|                                                        |            |             |     |       |               | 402.75 | 5            | 2             |             |
|                                                        | 8          | -0.50       | +   |       | 0.32          | -      | 838.2        | 55.2          | 0.00        |
|                                                        |            |             |     |       |               | 402.22 | 1            | 7             |             |
| Personal Experience - TRUST                            | 1          | 0.00        |     |       |               | -      | <b>915.2</b> | <b>0.00</b>   | <b>0.68</b> |
|                                                        |            |             |     |       |               | 453.56 | <b>5</b>     |               |             |

R<sup>2</sup> = 0.04, df = 299

|   |       |   |   |      |        |              |             |             |
|---|-------|---|---|------|--------|--------------|-------------|-------------|
| 2 | -0.11 |   |   | 0.19 | -      | <b>917.0</b> | <b>1.83</b> | <b>0.27</b> |
|   |       |   |   |      | 453.44 | <b>7</b>     |             |             |
| 3 | -0.05 |   | + |      | -      | 921.6        | 6.37        | 0.03        |
|   |       |   |   |      | 451.52 | <b>2</b>     |             |             |
| 4 | -0.19 |   | + | 0.24 | -      | 923.3        | 8.12        | 0.01        |
|   |       |   |   |      | 451.33 | <b>7</b>     |             |             |
| 5 | -0.16 | + |   |      | -      | 927.9        | 12.7        | 0.00        |
|   |       |   |   |      | 449.30 | <b>8</b>     | <b>4</b>    |             |
| 6 | -0.28 | + |   | 0.23 | -      | 929.8        | 14.5        | 0.00        |
|   |       |   |   |      | 449.13 | <b>4</b>     | <b>9</b>    |             |
| 7 | -0.25 | + | + |      | -      | 935.0        | 19.8        | 0.00        |
|   |       |   |   |      | 447.28 | <b>9</b>     | <b>4</b>    |             |
| 8 | -0.39 | + | + | 0.25 | -      | 936.9        | 21.7        | 0.00        |
|   |       |   |   |      | 447.07 | <b>4</b>     | <b>0</b>    |             |

| Response Variable                                            | Model Rank | (Intercept) | Age | Group | General Trust | LogLik   | AICc         | ΔAICc       | wt          |
|--------------------------------------------------------------|------------|-------------|-----|-------|---------------|----------|--------------|-------------|-------------|
| Personal Experience - USE<br>R <sup>2</sup> = 0.16, df = 291 | 1          | 0.07        | +   |       |               | -        | <b>893.1</b> | <b>0.00</b> | <b>0.41</b> |
|                                                              |            |             |     |       |               | 430.74   | <b>1</b>     |             |             |
|                                                              | 2          | 0.07        |     |       |               | -        | <b>893.9</b> | <b>0.87</b> | <b>0.27</b> |
|                                                              |            |             |     |       |               | 441.89   | <b>8</b>     |             |             |
|                                                              | 3          | -0.07       | +   |       | 0.23          | -        | <b>894.8</b> | <b>1.75</b> | <b>0.17</b> |
|                                                              |            |             |     |       |               | 430.51   | <b>6</b>     |             |             |
|                                                              | 4          | -0.09       |     |       | 0.30          | -        | 895.5        | 2.39        | 0.12        |
|                                                              |            |             |     |       |               | 441.61   | <b>0</b>     |             |             |
| 5                                                            | 0.22       |             |     | +     |               | -        | 899.9        | 6.87        | 0.01        |
|                                                              |            |             |     |       | 439.62        | <b>7</b> |              |             |             |
| 6                                                            | 0.19       | +           | +   |       |               | -        | 901.0        | 7.93        | 0.00        |
|                                                              |            |             |     |       | 429.08        | <b>4</b> |              | <b>8</b>    |             |
| 7                                                            | 0.05       |             |     | +     | 0.30          | -        | 901.5        | 8.43        | 0.00        |
|                                                              |            |             |     |       | 439.33        | <b>4</b> |              | <b>6</b>    |             |
| 8                                                            | 0.04       | +           | +   | 0.29  |               | 428.80   | 902.7        | 9.68        | 0.00        |
|                                                              |            |             |     |       |               |          | <b>9</b>     |             | <b>3</b>    |
