# Supplementary material for: Communicating science: Sending the right message to the right audience
Source: Atypon-hosted journal article supplement (doi:10.1139/facets-2016-0015), 2016-08-31
Supplement: facets-2016-0015_supplement4.pdf [file facets-2016-0015_supplement4.pdf]

## Web-only material

**Table S3.** Mean ( $\pm$  SD) self-reported interaction between target groups of scientific information on a scale of 0 (“never” communicating) to 100 (“daily” communication). Rows are the survey respondents by group, and sample size (N) is given in parentheses. Diagonal values across the table are within-group communication levels.

|                        | Policy Maker            | Resource Manager        | Academic Scientist       | Non-Academic Scientist  | Student                  | General Public          |
|------------------------|-------------------------|-------------------------|--------------------------|-------------------------|--------------------------|-------------------------|
| Policy Maker           | 92.7 $\pm$ 10.5<br>(6)  | 54.7 $\pm$ 32.1<br>(6)  | 36.3 $\pm$ 25.9<br>(6)   | 44.8 $\pm$ 26.3<br>(6)  | 34 $\pm$ 41.6<br>(6)     | 58.7 $\pm$ 34.5<br>(6)  |
| Resource Manger        | 46.6 $\pm$ 28.9<br>(22) | 81.9 $\pm$ 22.4<br>(25) | 57.2 $\pm$ 25.6<br>(25)  | 68.1 $\pm$ 29.8<br>(25) | 48.2 $\pm$ 26.3<br>(23)  | 75.3 $\pm$ 29.3<br>(23) |
| Academic Scientist     | 29.3 $\pm$ 22.7<br>(54) | 46.1 $\pm$ 26.1<br>(64) | 97.8 $\pm$ 6.0<br>(70)   | 57.0 $\pm$ 25.0<br>(67) | 85.7 $\pm$ 24.1<br>(70)  | 77.4 $\pm$ 32.0<br>(67) |
| Non-Academic Scientist | 36.5 $\pm$ 27.4<br>(55) | 59.8 $\pm$ 29.8<br>(58) | 62.3 $\pm$ 29.0<br>(65)  | 86.6 $\pm$ 17.9<br>(64) | 58.1 $\pm$ 32.0<br>(62)  | 77.7 $\pm$ 30.0<br>(61) |
| Student                | 15.9 $\pm$ 19.1<br>(73) | 21.8 $\pm$ 20.8<br>(77) | 70.7 $\pm$ 34.1<br>(101) | 38.9 $\pm$ 28.4<br>(92) | 89.4 $\pm$ 21.7<br>(103) | 79.8 $\pm$ 30.6<br>(99) |
| Public                 | 21.4 $\pm$ 25.4<br>(91) | 16.1 $\pm$ 19.9<br>(95) | 32.7 $\pm$ 30.3<br>(100) | 30.7 $\pm$ 28.7<br>(98) | 47.0 $\pm$ 34.0<br>(94)  | 66.4 $\pm$ 37.4<br>(98) |
